# Supplementary material for: Lactoferrin-conjugated pH and redox-sensitive polymersomes based on PEG-S-S-PLA-PCL-OH boost delivery of bacosides to the brain
Source: Royal Society of Chemistry journal article supplement (doi:10.1039/c8nr03828g), 2018-01-01
Supplement: c8nr03828g1.pdf [file c8nr03828g1.pdf]

## Supporting Information

# Lactoferrin Conjugated pH and Redox Sensitive Polymersomes based on PEG-S-S-PLA-PCL-OH boosts Delivery of Bacosides to Brain

Kritika Goyal<sup>†</sup>, Arpita Konar<sup>‡,\*</sup>, B.S.Hemanth Kumar<sup>¶</sup>, Veena Koul<sup>†,‡,\*</sup>

<sup>†</sup>Center for Biomedical Engineering, Indian Institute of Technology Delhi; <sup>‡</sup>Institute of Genomics and Integrative Biology, New Delhi; <sup>¶</sup>NMR Research Centre, Institute of Nuclear Medicine and Allied Sciences (INMAS), New Delhi; <sup>\*</sup> Biomedical Engineering Unit, All India Institute of Medical Sciences, New Delhi.

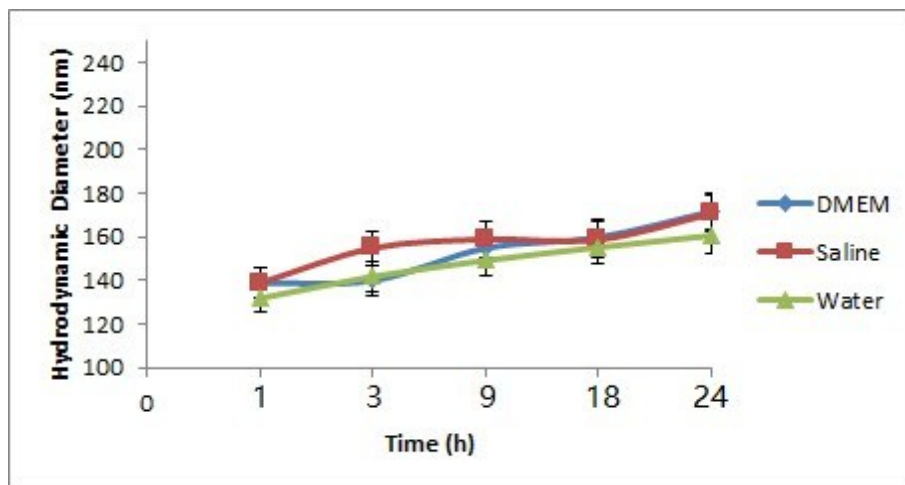

S1: Size deviation of polymersomes in various media

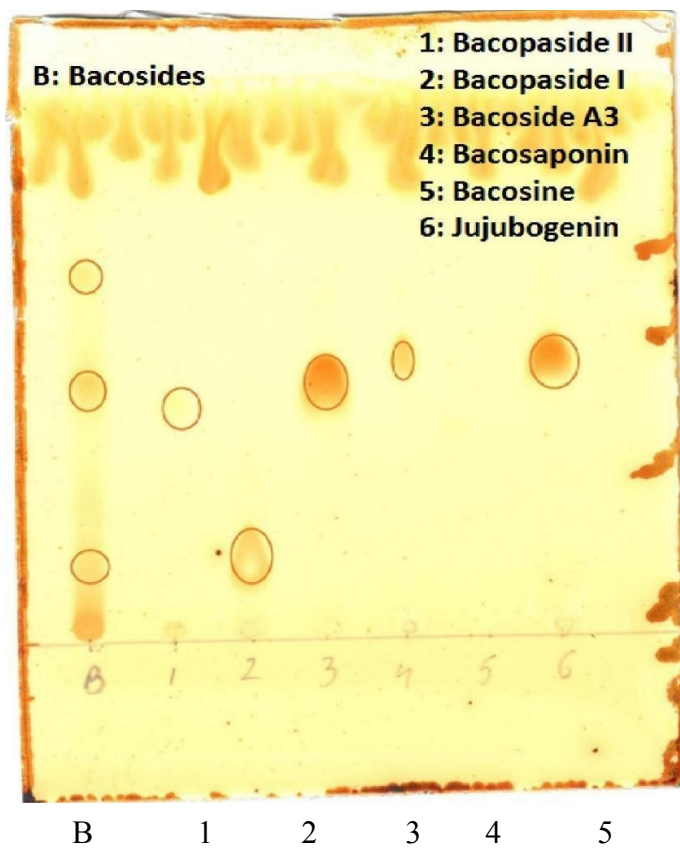

**S2: TCL of Bacoside fraction**

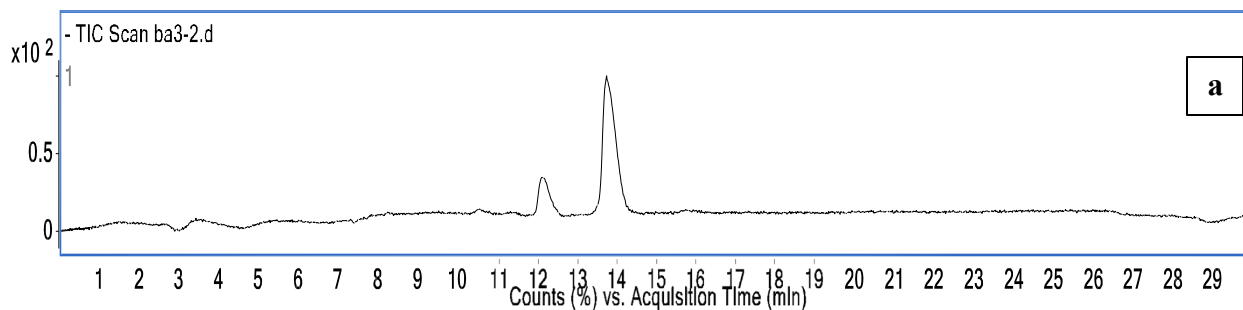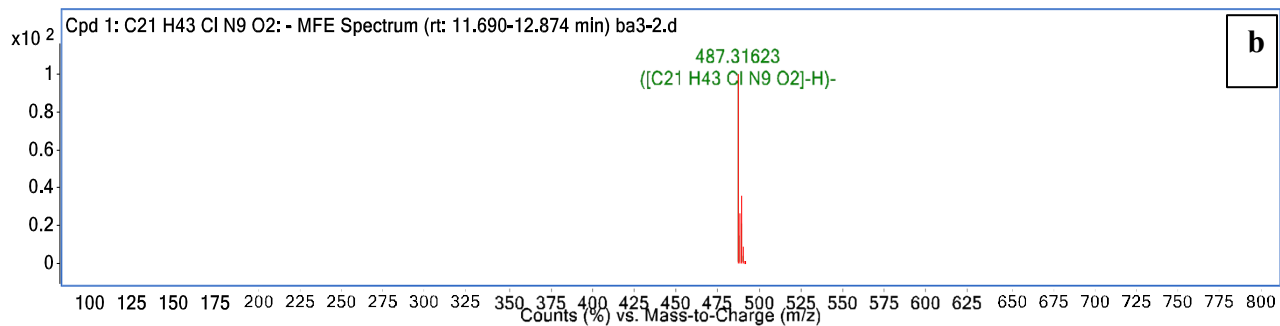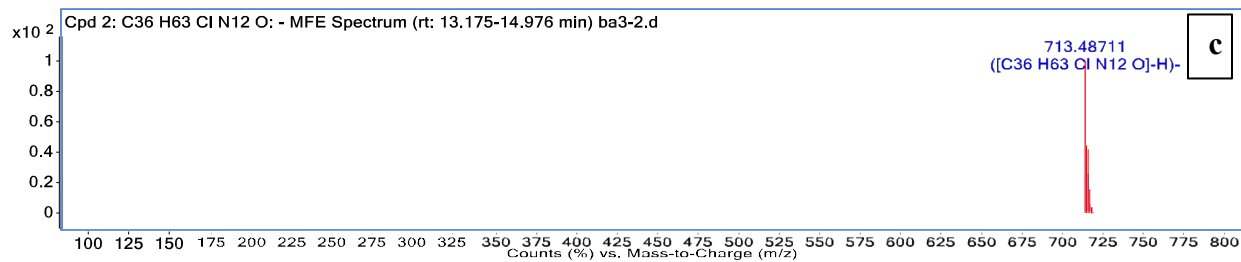

**S3: Chromatogram of A: Bacoside A3 (analytical standard); LC-MS of B: peak with rt: 11.690-12.874; C: peak with rt: 13.175-14.976**

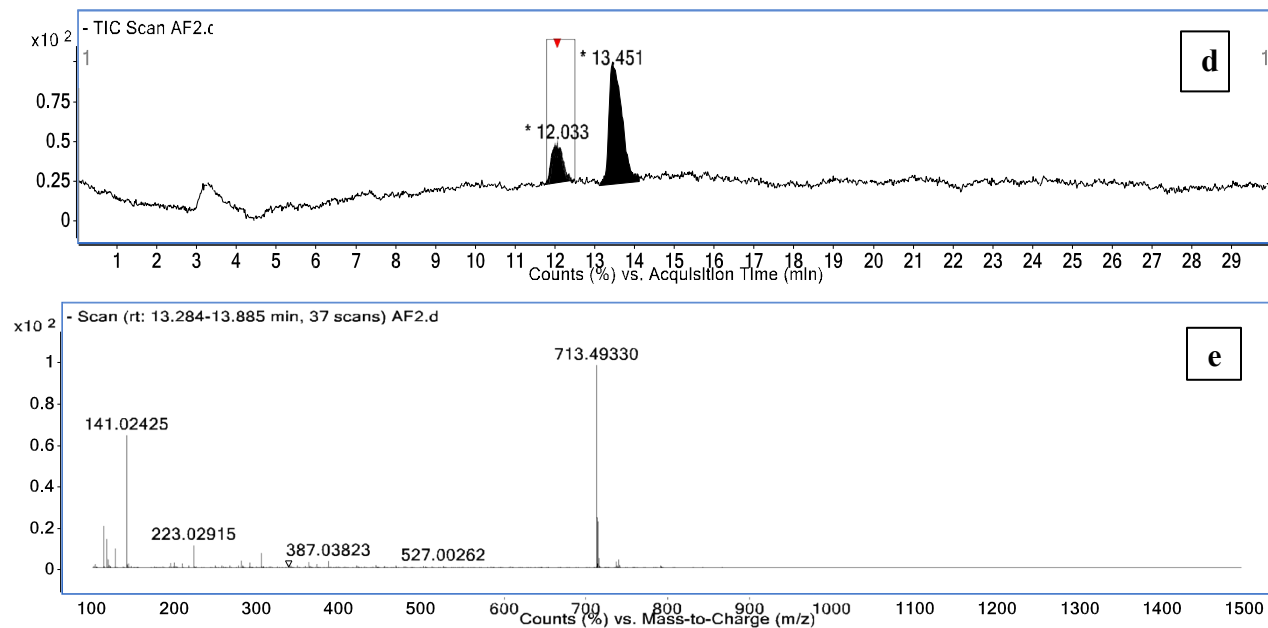

**S3 D: Chromatogram of Bacoside fraction; E: LC-MS of Bacoside fraction**

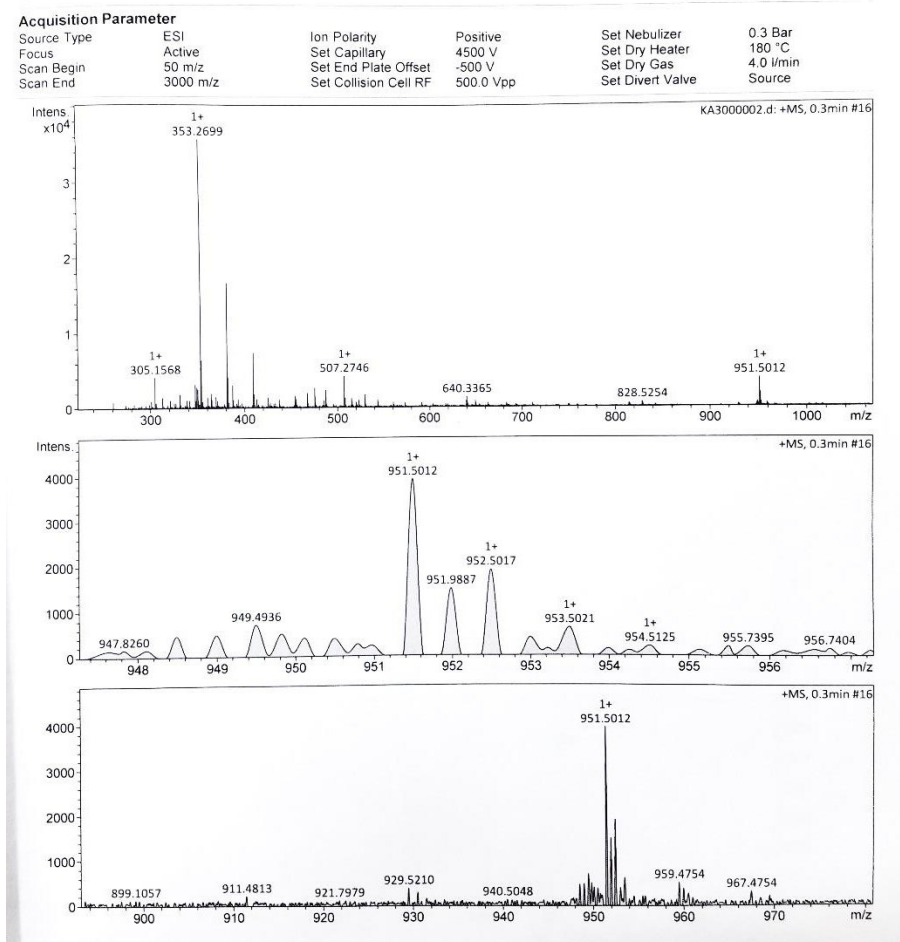

#### S4: Mass spectrometry fragmentation pattern of Bacoside A3.

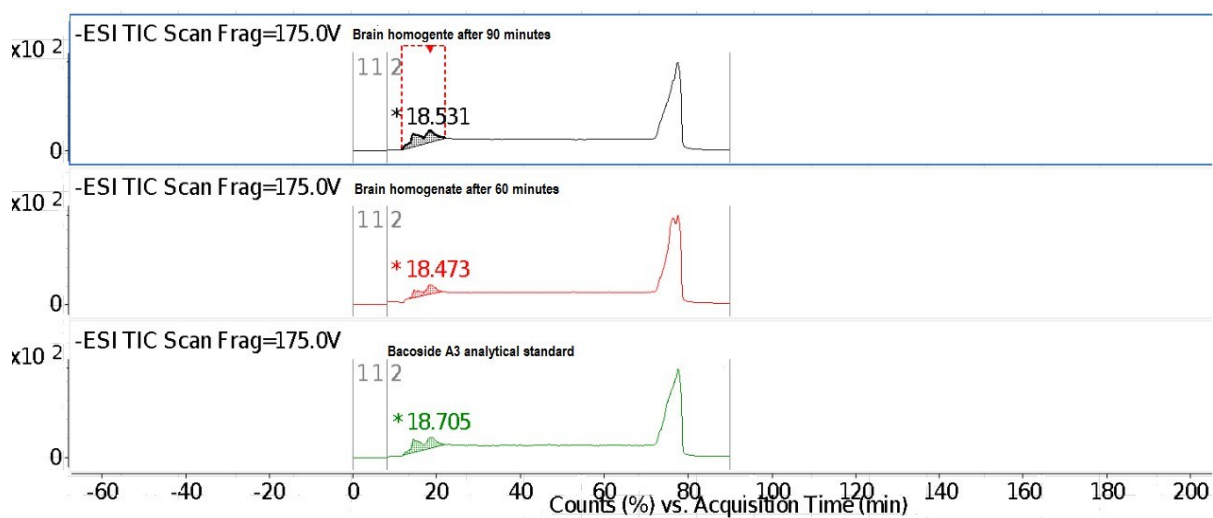

#### S5: Acquisition time of the brain homogenates and Bacoside A3 analytical standard
